# Supplementary material
Source: PubMed Central journal article supplement (PMC11028864)
Supplement: 262_2016_1857_MOESM1_ESM.pdf [file 262_2016_1857_MOESM1_ESM.pdf]

**a**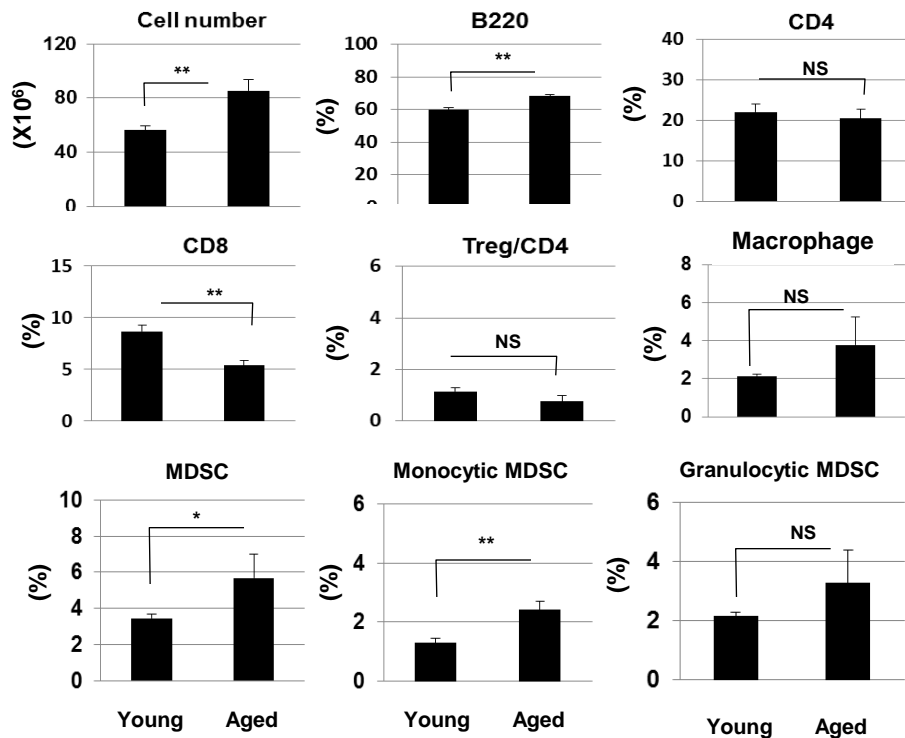**b**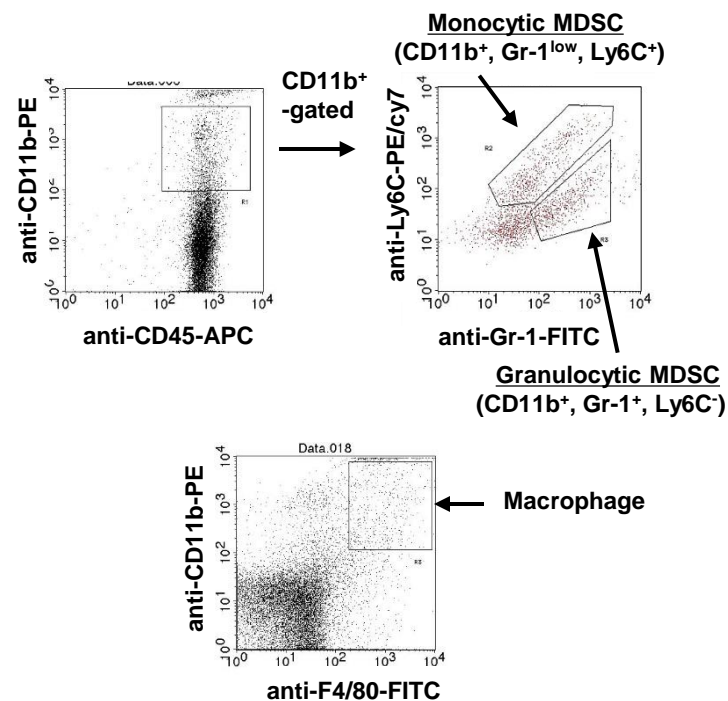

**Supplemental Figure 1** Flow cytometric analysis of the spleen cells of young and aged mice. **(a)** The spleen cells from young (7 W) and aged (60 W) BALB/c mice were analyzed by flow cytometry. \*  $P < 0.05$ , \*\*  $P < 0.01$ . Each group consisted of 3 or 4 mice. NS, not significant. **(b)** The gating and staining strategies to detect MDSCs and macrophages are shown.

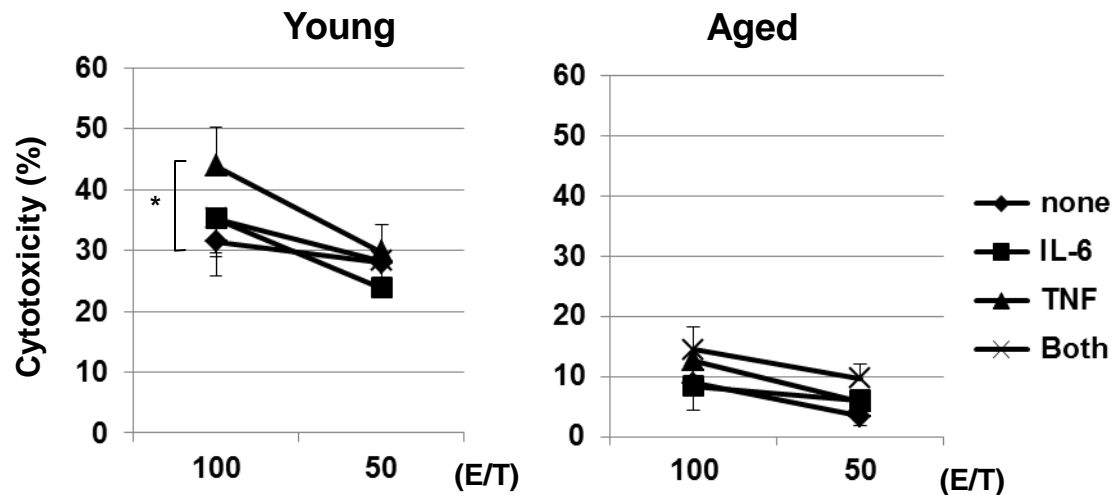

**Supplemental Figure 2** *In vitro* effect of IL-6 and/or TNF- $\alpha$  on the induction of anti-CT26 CTLs from spleen cells of vaccinated young and aged mice. IL-6 (200 pg/mL) and/or TNF- $\alpha$  (100 pg/mL) were added to the *in vitro* culture of spleen cells from young (7 W) and aged (60W) mice vaccinated with  $1 \times 10^6$  DTX-treated CT26 cells 2 weeks before. \* $P < 0.05$  between untreated and combination groups.
